# Supplementary material for: Influence of Skeletal Muscle Volume Loss During Lenvatinib Treatment on Prognosis in Unresectable Hepatocellular Carcinoma: A Multicenter Study in Tohoku, Japan
Source: Research Square preprint supplement (doi:10.21203/rs.3.rs-1325658/v1), 2022-02-07
Supplement: Supplementary file 1 [file d78b349b377ba86a32f49788.pdf]

Table S1. Adverse events (AEs) in the low and normal PMI groups

|                        | Grade 3 or worse    |                  |         | Any grade  |            |         |
|------------------------|---------------------|------------------|---------|------------|------------|---------|
|                        | normal PMI (n = 68) | Low PMI (n = 64) | P value | normal PMI | Low PMI    | P value |
| Hypertension           | 2 (2.9%)            | 3 (4.7%)         | 0.604   | 24 (35.3%) | 25 (39.1%) | 0.648   |
| Diarrhea               | 2 (2.9%)            | 1 (1.6%)         | 0.604   | 14 (20.6%) | 13 (20.3%) | 0.976   |
| Anorexia               | 1 (1.5%)            | 4 (6.3%)         | 0.153   | 25 (36.8%) | 24 (37.5%) | 0.926   |
| Fatigue                | 1 (1.5%)            | 4 (6.3%)         | 0.153   | 29 (42.6%) | 19 (29.7%) | 0.123   |
| Hoarseness             | 0 (0%)              | 0 (0%)           |         | 10 (14.7%) | 11 (17.2%) | 0.696   |
| Hypothyroidism         | 0 (0%)              | 0 (0%)           |         | 21 (30.9%) | 20 (31.3%) | 0.96    |
| Body weight loss       | 0 (0%)              | 0 (0%)           |         | 10 (14.7%) | 7 (10.9%)  | 0.524   |
| Hand foot syndrome     | 2 (2.9%)            | 3 (4.7%)         | 0.569   | 27 (39.7%) | 21 (32.8%) | 0.415   |
| Proteinuria            | 4 (5.9%)            | 7 (10.9%)        | 0.296   | 18 (26.5%) | 15 (23.4%) | 0.694   |
| Liver damage           | 1 (1.5%)            | 1 (1.6%)         | 0.973   | 7 (10.3%)  | 6 (9.4%)   | 0.866   |
| Hepatic encephalopathy | 3 (4.4%)            | 1 (1.6%)         | 0.774   | 4 (5.9%)   | 3 (4.7%)   | 0.753   |

AEs were assessed according to the National Cancer Institute Common Terminology Criteria for Adverse Events, version 4.0.

PMI: psoas muscle index, Low PMI group: PMI <6.0 cm<sup>2</sup>/m<sup>2</sup> for men and <3.4 cm<sup>2</sup>/m<sup>2</sup> for women, normal PMI group: PMI ≥6.0 cm<sup>2</sup>/m<sup>2</sup> for men and ≥3.4 cm<sup>2</sup>/m<sup>2</sup> for women.

Table S2. Adverse events (AEs) in the severe and mild atrophy groups

|                        | Grade 3 or worse      |                         |              | Any grade    |                |         |
|------------------------|-----------------------|-------------------------|--------------|--------------|----------------|---------|
|                        | Mild atrophy (n = 67) | Severe atrophy (n = 65) | P value      | Mild atrophy | Severe atrophy | P value |
| Hypertension           | <b>5 (7.5%)</b>       | <b>0 (0%)</b>           | <b>0.024</b> | 21 (38.8%)   | 23 (35.4%)     | 0.589   |
| Diarrhea               | 3 (4.5%)              | 0 (0%)                  | 0.082        | 16 (23.9%)   | 11 (16.9%)     | 0.282   |
| Anorexia               | 2 (3.0%)              | 3 (4.6%)                | 0.655        | 24 (35.8%)   | 25 (38.5%)     | 0.858   |
| Fatigue                | 1 (1.5%)              | 4 (6.2%)                | 0.175        | 23 (34.3%)   | 25 (38.5%)     | 0.718   |
| Hoarseness             | 0 (0%)                | 0 (0%)                  |              | 11 (16.4%)   | 10 (15.4%)     | 0.815   |
| Hypothyroidism         | 0 (0%)                | 0 (0%)                  |              | 18 (26.9%)   | 23 (35.4%)     | 0.347   |
| Body weight loss       | 0 (0%)                | 0 (0%)                  |              | 10 (14.9%)   | 7 (10.8%)      | 0.439   |
| Hand foot syndrome     | 2 (3.0%)              | 3 (4.6%)                | 0.655        | 23 (34.3%)   | 25 (38.5%)     | 0.718   |
| Proteinuria            | 8 (11.8%)             | 3 (4.6%)                | 0.117        | 11 (28.4%)   | 14 (21.5%)     | 0.316   |
| Liver damage           | 1 (1.5%)              | 1 (1.5%)                | 1            | 6 (9.0%)     | 7 (10.8%)      | 0.774   |
| Hepatic encephalopathy | 2 (3.0%)              | 2 (3.1%)                | 0.602        | 3 (4.5%)     | 4 (6.2%)       | 0.69    |

AEs were assessed according to the National Cancer Institute Common Terminology Criteria for Adverse Events, version 4.0.

PMI: psoas muscle index, Severe atrophy group:  $\Delta$ PMI/m rate >1%, Mild atrophy group:  $\Delta$ PMI/m rate <1%.
